# Supplementary material for: Sugar Sweetened Beverages Attributable Disease Burden and the Potential Impact of Policy Interventions: A Systematic Review of Epidemiological and Decision Models
Source: Research Square preprint supplement (doi:10.21203/rs.3.rs-143826/v1), 2021-01-15
Supplement: Supplementary file 1 [file 39f272bf9084175d415a1500.docx]

**Sugar sweetened beverages attributable disease burden and the potential impact of policy interventions: a systematic review of epidemiological and decision models**

**Supplementary information**

1. **Search Strategy**

**MEDLINE** (Ovid MEDLINE(R) Epub Ahead of Print, In-Process & Other Non-Indexed Citations, Ovid MEDLINE(R) Daily and Ovid MEDLINE(R) 1946 to Present)

1 exp Models, Economic/

2 Economic Model*.ti,ab.

3 Econometric Model*.ti,ab.

4 Decision Analy*.ti,ab.

5 exp Cost-Benefit Analysis/

6 Cost Benefit.ti,ab.

7 Cost Effectiv*.ti,ab.

8 Comparative Risk.ti,ab.

9 Risk Assess*.ti,ab.

10 DALY*.ti,ab.

11 QALY*.ti,ab.

12 Policy Model.ti,ab.

13 Mathematical Model*.ti,ab.

14 Mathematical Analys*.ti,ab.

15 Public Health Model*.ti,ab.

16 Public Health Intervention*.ti,ab.

17 Modelling.ti,ab.

18 Policy Evaluation*.ti,ab.

19 exp Markov Chains/

20 Markov.ti,ab.

21 exp Monte Carlo Method/

22 Monte Carlo.ti,ab.

23 exp Regression Analysis/

24 Regression Analy*.ti,ab.

25 exp Models, Statistical/

26 Statistical Model*.ti,ab.

27 Probabilistic Model*.ti,ab.

28 or/1-27

29 Burden.ti,ab.

30 Attributable*.ti,ab.

31 Societal Cost*.ti,ab.

32 or/29-31

33 Model*.ti,ab.

34 Estimat*.ti,ab.

35 Projection*.ti,ab.

36 Projecting.ti,ab.

37 or/33-36

38 32 and 37

39 28 or 38

40 exp Carbonated Beverages/

41 Soda*.ti,ab.

42 Carbonated Beverage*.ti,ab.

43 Carbonated Drink*.ti,ab.

44 SSB.ti,ab.

45 Carbonated Drink*.ti,ab.

46 Soft Drink*.ti,ab.

47 Soft Beverage*.ti,ab.

48 Sweetened Drink*.ti,ab.

49 Sweetened Beverage*.ti,ab.

50 Sugared Drink*.ti,ab.

51 Sugary Drink*.ti,ab.

52 Sugared Beverage*.ti,ab.

53 Sugary Beverage*.ti,ab.

54 Cola.ti,ab.

55 Sport Drink*.ti,ab.

56 Sport Beverage*.ti,ab.

57 Fruit Drink*.ti,ab.

58 Fruit Beverage*.ti,ab.

59 exp "Fruit and Vegetable Juices"/

60 Juice*.ti,ab.

61 Fizzy Drink*.ti,ab.

62 Fizzy Beverage*.ti,ab.

63 or/40-62

64 exp Sweetening Agents/

65 exp Dietary Sugars/

66 Syrupe*.ti,ab.

67 Sucrose*.ti,ab.

68 Fructose*.ti,ab.

69 or/64-68

70 Beverage*.ti,ab.

71 Drink*.ti,ab.

72 70 or 71

73 69 and 72

74 63 or 73

75 exp Diabetes Mellitus/

76 Diabetes.ti,ab.

77 Diabetic*.ti,ab.

78 exp Overweight/

79 Obes*.ti,ab.

80 Overweight.ti,ab.

81 exp Body Mass Index/

82 BMI.ti,ab.

83 exp Cardiovascular Diseases/

84 Cardiovascular.ti,ab.

85 CVD.ti,ab.

86 Heart Disease*.ti,ab.

87 exp Dental Caries/

88 Dental Decay.ti,ab.

89 Caries.ti,ab.

90 exp Neoplasms/

91 Neoplas*.ti,ab.

92 Cancer.ti,ab.

93 Tumor*.ti,ab.

94 Tumour*.ti,ab.

95 Carcinom*.ti,ab.

96 Malignan*.ti,ab.

97 exp Hypertension/

98 Hypertens*.ti,ab.

99 Blood Pressure.ti,ab.

100 or/75-99

101 39 and 74 and 100

**Cochrane (Wiley)**

ID Search Hits

#1 MeSH descriptor: [Models, Economic] explode all trees

#2 Economic Model*:ti,ab,kw (Word variations have been searched)

#3 Econometric Model*:ti,ab,kw (Word variations have been searched)

#4 Decision Analy*:ti,ab,kw (Word variations have been searched)

#5 MeSH descriptor: [Cost-Benefit Analysis] explode all trees

#6 Cost Benefit:ti,ab,kw (Word variations have been searched)

#7 Cost Effectiv*:ti,ab,kw (Word variations have been searched)

#8 Comparative Risk:ti,ab,kw (Word variations have been searched)

#9 Risk Assess*:ti,ab,kw (Word variations have been searched)

#10 DALY*:ti,ab,kw (Word variations have been searched)

#11 QALY*:ti,ab,kw (Word variations have been searched)

#12 Policy Model:ti,ab,kw (Word variations have been searched)

#13 Mathematical Model*:ti,ab,kw (Word variations have been searched)

#14 Mathematical Analys*:ti,ab,kw (Word variations have been searched)

#15 Public Health Model*:ti,ab,kw (Word variations have been searched)

#16 Public Health Intervention*:ti,ab,kw (Word variations have been searched)

#17 Modelling:ti,ab,kw (Word variations have been searched)

#18 Policy Evaluation*:ti,ab,kw (Word variations have been searched)

#19 MeSH descriptor: [Markov Chains] explode all trees

#20 Markov:ti,ab,kw (Word variations have been searched)

#21 MeSH descriptor: [Monte Carlo Method] explode all trees

#22 Monte Carlo:ti,ab,kw (Word variations have been searched)

#23 MeSH descriptor: [Regression Analysis] explode all trees

#24 Regression Analy*:ti,ab,kw (Word variations have been searched)

#25 MeSH descriptor: [Models, Statistical] explode all trees

#26 Statistical Model*:ti,ab,kw (Word variations have been searched)

#27 Probabilistic Model*:ti,ab,kw (Word variations have been searched)

#28 #1 or #2 or #3 or #4 or #5 or #6 or #7 or #8 or #9 or #10 or #11 or #12 or #13 or #14 or #15 or #16 or #17 or #18 or #19 or #20 or #21 or #22 or #23 or #24 or #25 or #26 or #27

#29 Burden:ti,ab,kw (Word variations have been searched)

#30 Attributable*:ti,ab,kw (Word variations have been searched)

#31 Societal Cost*:ti,ab,kw (Word variations have been searched)

#32 #29 or #30 or #31

#33 Model*:ti,ab,kw (Word variations have been searched)

#34 Estimat*:ti,ab,kw (Word variations have been searched)

#35 Projection*:ti,ab,kw (Word variations have been searched)

#36 Projecting:ti,ab,kw (Word variations have been searched)

#37 #33 or #34 or #35 or #36

#38 #32 and #37 #39 #28 or #38

#40 MeSH descriptor: [Carbonated Beverages] explode all trees

#41 Soda*:ti,ab,kw (Word variations have been searched)

#42 Carbonated Beverage*:ti,ab,kw (Word variations have been searched)

#43 Carbonated Drink*:ti,ab,kw (Word variations have been searched)

#44 SSB:ti,ab,kw (Word variations have been searched)

#45 Carbonated Drink*:ti,ab,kw (Word variations have been searched)

#46 Soft Drink*:ti,ab,kw (Word variations have been searched)

#47 Soft Beverage*:ti,ab,kw (Word variations have been searched)

#48 Sweetened Drink*:ti,ab,kw (Word variations have been searched)

#49 Sweetened Beverage*:ti,ab,kw (Word variations have been searched)

#50 Sugared Drink*:ti,ab,kw (Word variations have been searched)

#51 Sugary Drink*:ti,ab,kw (Word variations have been searched)

#52 Sugared Beverage*:ti,ab,kw (Word variations have been searched)

#53 Sugary Beverage*:ti,ab,kw (Word variations have been searched)

#54 Cola:ti,ab,kw (Word variations have been searched)

#55 Sport Drink*:ti,ab,kw (Word variations have been searched)

#56 Sport Beverage*:ti,ab,kw (Word variations have been searched)

#57 Fruit Drink*:ti,ab,kw (Word variations have been searched)

#58 Fruit Beverage*:ti,ab,kw (Word variations have been searched)

#59 MeSH descriptor: [Fruit and Vegetable Juices] explode all trees

#60 Juice*:ti,ab,kw (Word variations have been searched)

#61 Fizzy Drink*:ti,ab,kw (Word variations have been searched)

#62 Fizzy Beverage*:ti,ab,kw (Word variations have been searched)

#63 #40 or #41 or #42 or #43 or #44 or #45 or #46 or #47 or #48 or #49 or #50 or #51 or #52 or #53 or #54 or #55 or #56 or #57 or #58 or #59 or #60 or #61 or #62

#64 MeSH descriptor: [Sweetening Agents] explode all trees

#65 MeSH descriptor: [Dietary Sugars] explode all trees

#66 Syrupe*:ti,ab,kw (Word variations have been searched)

#67 Sucrose*:ti,ab,kw (Word variations have been searched)

#68 Fructose*:ti,ab,kw (Word variations have been searched)

#69 #64 or #65 or #66 or #67 or #68

#70 Beverage*:ti,ab,kw (Word variations have been searched)

#71 Drink*:ti,ab,kw (Word variations have been searched)

#72 #70 or #71

#73 #69 and #72

#74 #63 or #73

#75 MeSH descriptor: [Diabetes Mellitus] explode all trees

#76 Diabetes:ti,ab,kw (Word variations have been searched)

#77 Diabetic*:ti,ab,kw (Word variations have been searched)

#78 MeSH descriptor: [Overweight] explode all trees

#79 Obes*:ti,ab,kw (Word variations have been searched)

#80 Overweight:ti,ab,kw (Word variations have been searched)

#81 MeSH descriptor: [Body Mass Index] explode all trees

#82 BMI:ti,ab,kw (Word variations have been searched)

#83 MeSH descriptor: [Cardiovascular Diseases] explode all trees

#84 Cardiovascular:ti,ab,kw (Word variations have been searched)

#85 CVD:ti,ab,kw (Word variations have been searched)

#86 Heart Disease*:ti,ab,kw (Word variations have been searched)

#87 MeSH descriptor: [Dental Caries] explode all trees

#88 Dental Decay:ti,ab,kw (Word variations have been searched)

#89 Caries:ti,ab,kw (Word variations have been searched)

#90 MeSH descriptor: [Neoplasms] explode all trees

#91 Neoplas*:ti,ab,kw (Word variations have been searched)

#92 Cancer:ti,ab,kw (Word variations have been searched)

#93 Tumor*:ti,ab,kw (Word variations have been searched)

#94 Tumour*:ti,ab,kw (Word variations have been searched)

#95 Carcinom*:ti,ab,kw (Word variations have been searched)

#96 Malignan*:ti,ab,kw (Word variations have been searched)

#97 MeSH descriptor: [Hypertension] explode all trees

#98 Hypertens*:ti,ab,kw (Word variations have been searched)

#99 Blood Pressure:ti,ab,kw (Word variations have been searched)

#100 #75 or #76 or #77 or #78 or #79 or #80 or #81 or #82 or #83 or #84 or #85 or #86 or #87 or #88 or #89 or #90 or #91 or #92 or #93 or #94 or #95 or #96 or #97 or #98 or #99

#101 #39 and #74 and #100

**EMBase (Elsevier)**

No. Query

#94  #30 AND #65 AND #93

#93  #66 OR #67 OR #68 OR #69 OR #70 OR #71 OR #72 OR #73 OR #74 OR #75 OR #76 OR #77 OR #78 OR #79 OR #80 OR #81 OR #82 OR #83 OR #84 OR #85 OR #86 OR #87 OR #88 OR #89 OR #90 OR #91 OR #92

#92  'blood pressure':ti,ab

#91  hypertens*:ti,ab

#90  'hypertension'/exp

#89  malignan*:ti,ab

#88  carcinom*:ti,ab

#87  tumour*:ti,ab

#86  tumor*:ti,ab

#85  cancer:ti,ab

#84  neoplas*:ti,ab

#83  'neoplasm'/exp

#82  caries:ti,ab

#81  'dental decay':ti,ab

#80  'dental caries'/exp

#79  'heart diseases':ti,ab

#78  'heart disease':ti,ab

#77  'cvd':ti,ab

#76  'cardiovascular':ti,ab

#75  'cardiovascular disease'/exp

#74  'body mass':ti,ab

#73  bmi:ti,ab

#72  'body mass'/exp

#71  overweight:ti,ab

#70  obes*:ti,ab

#69  'obesity'/exp

#68  diabetic*:ti,ab

#67  diabetes:ti,ab

#66  'diabetes mellitus'/exp

#65  #54 OR #64

#64  #60 AND #63

#63  #61 OR #62

#62  drink*:ti,ab

#61  beverage*:ti,ab

#60  #55 OR #56 OR #57 OR #58 OR #59

#59  fructose*:ti,ab

#58  sucrose*:ti,ab

#57  syrupe*:ti,ab

#56  'sugar intake'/exp

#55  'sweetening agent'/exp

#54  #31 OR #32 OR #33 OR #34 OR #35 OR #36 OR #37 OR #38 OR #39 OR #40 OR #41 OR #42 OR #43 OR #44

OR #45 OR #46 OR #47 OR #48 OR #49 OR #50 OR #51 OR #52 OR #53

#53  'fizzy beverage':ti,ab OR 'fizzy beverages':ti,ab

#52  'fizzy drink':ti,ab OR 'fizzy drinks':ti,ab

#51  juice*:ti,ab

#50  'fruit and vegetable juice'/exp

#49  'fruit beverage':ti,ab OR 'fruit beverages':ti,ab

#48  'fruit drink':ti,ab OR 'fruit drinks':ti,ab

#47  'sport beverage':ti,ab OR 'sport beverages':ti,ab

#46  'sport drink':ti,ab OR 'sport drinks':ti,ab

#45  cola:ti,ab

#44  'sugary beverage':ti,ab OR 'sugary beverages':ti,ab

#43  'sugary drink':ti,ab OR 'sugary drinks':ti,ab

#42  'sugared beverage':ti,ab OR 'sugared beverages':ti,ab

#41  'sugared drink':ti,ab OR 'sugared drinks':ti,ab

#40  'sweetened beverage':ti,ab OR 'sweetened beverages':ti,ab

#39  'sweetened drink':ti,ab OR 'sweetened drinks':ti,ab

#38  'soft beverage':ti,ab OR 'soft beverages':ti,ab

#37  'soft drink':ti,ab OR 'soft drinks':ti,ab

#36  'carbonated drink':ti,ab OR 'carbonated drinks':ti,ab

#35  ssb:ti,ab

#34  'carbonated dirnk':ti,ab OR 'carbonated drinks':ti,ab

#33  'carbonated beverage':ti,ab OR 'carbonated beverages':ti,ab

#32  soda*:ti,ab

#31  'carbonated beverage'/exp

#30  #28 OR #29

#29  ((burden OR attributable* OR societal) NEAR/3 (model OR estimat* OR projection* OR projecting)):ti,ab

#28  #1 OR #2 OR #3 OR #4 OR #5 OR #6 OR #7 OR #8 OR #9 OR #10 OR #11 OR #12 OR #13 OR #14 OR #15 OR

#16 OR #17 OR #18 OR #19 OR #20 OR #21 OR #22 OR #23 OR #24 OR #25 OR #26 OR #27

#27  'probabilistic model':ti,ab

#26  'statistical model':ti,ab

#25  'statistical model'/exp

#24  'regression analysis':ti,ab

#23  'regression analysis'/exp

#22  'monte carlo':ti,ab

#21  'monte carlo method'/exp

#20  markov:ti,ab

#19  'markov chain'/exp

#18  'policy evaluation':ti,ab

#17  'modelling':ti,ab

#16  'public health intervention':ti,ab

#15  'public health model':ti,ab

#14  'mathematical analysis':ti,ab

#13  'mathematical model':ti,ab

#12  'policy model':ti,ab

#11  qaly*:ti,ab

#10  daly*:ti,ab

#9  'risk assessment':ti,ab

#8  'comparative risk':ti,ab

#7  cost NEAR/1 effectiv*

#6  'cost benefit':ti,ab

#5  'cost benefit analysis'/exp

#4  'decision analysis':ti,ab

#3  'econometric model':ti,ab OR 'econometric models':ti,ab

#2  'economic model':ti,ab OR 'economic models':ti,ab

#1  'economic model'/exp

**CINAHL (EBSCO)**

# Query

S99 S36 AND S71 AND S98

S98 S72 OR S73 OR S74 OR S75 OR S76 OR S77 OR S78 OR S79 OR S80 OR S81 OR S82 OR S83 OR S84 OR S85 OR S86 OR

S87 OR S88 OR S89 OR S90 OR S91 OR S92 OR S93 OR S94 OR S95 OR S96 OR S97

S97 TI Blood Pressure OR AB Blood Pressure

S96 TI Hypertens* OR AB Hypertens*

S95 (MH "Hypertension+")

S94 TI Malignan* OR AB Malignan*

S93 TI Carcinom* OR AB Carcinom*

S92 TI Tumour* OR AB Tumour*

S91 TI Tumor* OR AB Tumor*

S90 TI Cancer OR AB Cancer

S89 TI Neoplas* OR AB Neoplas*

S88 (MH "Neoplasms+")

S87 TI Caries OR AB Caries

S86 TI Dental Decay OR AB Dental Decay

S85 (MH "Dental Caries")

S84 TI Heart Disease* OR AB Heart Disease*

S83 TI CVD OR AB CVD

S82 TI Cardiovascular OR AB Cardiovascular

S81 (MH "Cardiovascular Diseases+")

S80 TI Body Mass OR AB Body Mass

S79 TI BMI OR AB BMI

S78 (MM "Body Mass Index")

S77 TI Overweight OR AB Overweight

S76 TI Obes* OR AB Obes*

S75 (MH "Obesity+")

S74 TI Diabetic* OR AB Diabetic*

S73 TI Diabetes OR AB Diabetes

S72 (MH "Diabetes Mellitus+")

S71 S60 OR S70

S70 S66 AND S69

S69 S67 OR S68

S68 TI Drink* OR AB Drink*

S67 TI Beverage* OR AB Beverage*

S66 S61 OR S62 OR S63 OR S64 OR S65

S65 TI Fructose* OR AB Fructose*

S64 TI Sucrose OR AB Sucrose

S63 TI Syrupe* OR AB Syrupe*

S62 (MH "Dietary Sucrose")

S61 (MH "Sweetening Agents+")

S60 S37 OR S38 OR S39 OR S40 OR S41 OR S42 OR S43 OR S44 OR S45 OR S46 OR S47 OR S48 OR S49 OR S50 OR S51 OR S52 OR S53 OR S54 OR S55 OR S56 OR S57 OR S58 OR S59

S59 TI Fizzy Beverage* OR AB Fizzy Beverage*

S58 TI Fizzy Drink* OR AB Fizzy Drink*

S57 TI Juice* OR AB Juice*

S56 (MH "Fruit Juices+")

S55 TI Fruit Beverage* OR AB Fruit Beverage*

S54 TI Fruit Drink* OR AB Fruit Drink*

S53 TI Sport Beverage* OR AB Sport Beverage*

S52 TI Sport Drink* OR AB Sport Drink*

S51 TI Cola OR AB Cola

S50 TI Sugary Beverage* OR AB Sugary Beverage*

S49 TI Sugary Drink* OR AB Sugary Drink*

S48 TI Sugared Beverage* OR AB Sugared Beverage*

S47 TI Sugared Drink* OR AB Sugared Drink*

S46 TI Sweetened Beverage* OR AB Sweetened Beverage*

S45 TI Sweetened Drink* OR AB Sweetened Drink*

S44 TI Soft Beverage* OR AB Soft Beverage*

S43 TI Soft Drink* OR AB Soft Drink*

S42 TI Carbonated Drink* OR AB Carbonated Drink*

S41 TI SSB OR AB SSB

S40 TI Carbonated Drink* OR AB Carbonated Drink*

S39 TI Carbonated Beverage* OR AB Carbonated Beverage*

S38 TI Soda* OR AB Soda*

S37 (MH "Carbonated Beverages")

S36 S25 OR S35

S35 S29 AND S34

S34 S30 OR S31 OR S32 OR S33

S33 TI Projecting OR AB Projecting

S32 TI Projection* OR AB Projection*

S31 TI Estimat* OR AB Estimat*

S30 TI Model* OR AB Model*

S29 (S26 OR S27 OR S28)

S28 TI Societal Cost* OR AB Societal Cost*

S27 TI Attributable* OR AB Attributable*

S26 TI Burden OR AB Burden

S25 S1 OR S2 OR S3 OR S4 OR S5 OR S6 OR S7 OR S8 OR S9 OR S10 OR S11 OR S12 OR S13 OR S14 OR S15 OR S16 OR

S17 OR S18 OR S19 OR S20 OR S21 OR S22 OR S23 OR S24

S24 TI Probabilistic Model* OR AB Probabilistic Model*

S23 TI Statistical Model* OR AB Statistical Model*

S22 (MH "Models, Statistical")

S21 TI Regression Analy* OR AB Regression Analy*

S20 (MM "Regression")

S19 TI Monte Carlo OR AB Monte Carlo

S18 TI Markov OR AB Markov

S17 TI Policy Evaluation* OR AB Policy Evaluation*

S16 TI Modelling OR AB Modelling

S15 TI Public Health Intervention* OR AB Public Health Intervention*

S14 TI public health model OR AB Public Health Model*

S13 TI Mathematical Analys* OR AB Mathematical Analys*

S12 TI Mathematical Model* OR AB Mathematical Model*

S11 TI Policy Model OR AB Policy Model

S10 TI QALY* OR AB QALY*

S9 TI DALY* OR AB DALY*

S8 TI Risk Assess* OR AB Risk Assess*

S7 TI Comparative Risk OR AB Comparative Risk

S6 TI Cost Effectiv* OR AB Cost Effectiv*

S5 TI Cost Benefit OR AB Cost Benefit

S4 (MM "Cost Benefit Analysis")

S3 TI Decision Analy* OR AB Decision Analy*

S2 TI Econometric Model* OR AB Econometric Model*

S1 TI Economic Model* OR AB Economic Model*

**LILACS iAH**

(MH Modelos Económicos OR MH Análisis Costo-Beneficio OR (Econom$ AND Model$) OR ((Decision OR Decisão) AND Analis$)) OR ((Comparati$ OR Assess$ Evalua$) AND (Risk OR Riesgo$ OR Risco$)) OR DALY$ OR QALY$ OR ((Model$ OR Interven$) AND (Policy OR Public$))) AND (((Burden OR Carga OR Attributable OR Atribui$) AND (Model$)) AND (MH Carbonated Beverages OR Soda OR Refrigerante$ OR Refresco$ OR ((Bebida$ OR Drink$ OR Beverage$) AND (Carbonat$ OR Gaseosa$ OR Soft OR Azucarad$ OR Sugar$ OR Fruit OR Fruta$ OR Endulzad$ OR Adoçad$ OR Sport OR Deportiv$ OR Esportiv$ OR Sucros$ OR Syrupe OR Jarabe OR Xarope OR Fructos$ OR Fizzy OR Efervescente)) OR Juice$ OR Jugo$ OR Suco$ OR Cola) [Palabras]

1. **Model features by study**

| **Study ID** | **Type / Name** | **Sugar-specific** | **Time horizon** | **Population** | **Country/region** | **Perspectives** |
| --- | --- | --- | --- | --- | --- | --- |
| Afshin 2015[[1](#_ENREF_1)] | Comparative risk assessment framework | No | 1 year | Childs (5-15 years) | Australia | Societal |
| Barrientos-G. 2017[[2](#_ENREF_2)] | Markov cohort, based on a model of diabetes incidence | Yes | 10 years | Childs (2-5 years; | USA | Health system |
| Basu 2013[[3](#_ENREF_3)] | Stochastic, discrete-time microsimulation model (6.5 million children attending child care facilities) | No | 10 years | Adults (>20 years) | Africa (Middle east and north) | Health system |
| Basu 2014a[[4](#_ENREF_4)] | Stochastic, discrete-time microsimulation model | Yes | 10 years | Adults (>20 years) | Mexico | Health system |
| Basu 2014b[[5](#_ENREF_5)] | Stochastic, discrete-time, agent-based mathematical model + cost-effectiveness analysis | Yes | 20 years | Adults | USA | Government |
| Breeze 2017[[6](#_ENREF_6)] | Individual level simulation | No | Lifetime | Adults | India | Government |
| Briggs 2013a[[7](#_ENREF_7)] | Comparative risk assessment framework | Yes | 1 year | Adults | USA | Government |
| Briggs 2013b[[8](#_ENREF_8)] | Econometric and comparative risk assessment | Yes | 1 year | Adults (≥16 years) | UK | Societal |
| Briggs 2017[[9](#_ENREF_9)] | Comparative risk assessment framework | Yes | 1 year | Adults | Ireland | Health system |
| Brown 2018[[10](#_ENREF_10)] | Proportional multi-state lifetable model | No | 100 years | Adults (≥16 years) | UK | Government |
| Cobiac 2017[[11](#_ENREF_11)] | Proportional multi-state lifetable model | No | Lifetime | Total population | UK | Health system |
| Collins 2015[[12](#_ENREF_12)] | Montecarlo simulation | Yes | 20 years | Total population | Australia | Health system |
| Crino 2017[[13](#_ENREF_13)] | Proportional multi-state lifetable model (Obesity Model) | No | Lifetime | Total population | UK | Health system |
| Gortmaker 2015a[[14](#_ENREF_14)] | Markov cohort CHOICES-ACE (based on ACE Prevention, but modified with U.S. Population and healthcare costs) | No | 10 years, lifetime | Childs and adults (2-100 years) | Australia | Societal - |
| Gortmaker 2015b[[15](#_ENREF_15)] | Microsimulation model based on ACE Prevention (modified with U.S. population, healthcare costs, morbidity, and mortality data) | No | 10 years | Childs and adults | USA | Societal |
| Kristensen 2014[[16](#_ENREF_16)] | Microsimulation | No | 1 year | Childs and adults | USA | Societal |
| Lal 2017[[17](#_ENREF_17)] | Proportional multi-state lifetable model (Obesity Model) | No | Lifetime | Childs and adults (6-18 years) | USA | Health system |
| Lee 2018[[18](#_ENREF_18)] | Agent based model | No | 7 years | Childs and adults (2-100 years) | Australia | Societal |
| Lieffers 2018[[19](#_ENREF_19)] | Population attributable fraction based | No | 1 year | Childs and adults (11 a 18 years) | USA | Health system |
| Lin 2011[[20](#_ENREF_20)] | Dynamic population-based model | Yes | 10 years | Total population | Canada | Health system |
| Long 2015[[21](#_ENREF_21)] | Markov cohort (Obesity Model) | Yes | 10 years | Adults | USA | Government (cellection and taxes) |
| Ma 2016[[22](#_ENREF_22)] | Dynamic population-based model | Yes | 5 years | Childs and adults (2-100 years) | USA | Societal |
| Magnus 2016[[23](#_ENREF_23)] | Proportional multi-state lifetable model | No | Lifetime | Adults | UK | Government |
| Manyema 2014[[24](#_ENREF_24)] | Montecarlo simulation | Yes | 1 year | Total aboriginal and Torres Strait Islander population | Australia | Societal |
| Manyema 2015[[25](#_ENREF_25)] | Life table-based model in Microsoft Excel - Montecarlo simulation | Yes | 20 years | Adults (>20 years) | South Africa | Health system |
| Manyema 2016[[26](#_ENREF_26)] | Life table-based model in Microsoft Excel - Montecarlo simulation | Yes | 20 years | Adults (>20 years) | South Africa | Health system |
| Mekonnen 2013[[27](#_ENREF_27)] | Dynamic population-based model | No | 10 years | Adults (>20 years) | South Africa | Health system |
| Nomaguchi 2017[[28](#_ENREF_28)] | Proportional multi-state lifetable model (Obesity Model) | Yes | Lifetime | Adults | USA | Health system |
| Pearson-Stuttard 2017[[29](#_ENREF_29)] | Model adaptations | No | 15 years | Adults (>20 years) | Australia | Societal (focus on productivity) |
| Penalvo 2017[[30](#_ENREF_30)] | Comparative risk assessment framework | No | 1 year | Adults (>20 years) | USA | Health system |
| Rezende 2016[[31](#_ENREF_31)] | Population attributable fraction based | No | 20 years | Adults (>20 years) | USA | Health system |
| Sacks 2011[[32](#_ENREF_32)] | Markov | No | 10 years | Total population | Brazil | Health system |
| Sanchez-R. 2016[[33](#_ENREF_33)] | Dynamic population-based model | No | 10 years | Adults (>20 years) | Australia | Health system + |
| Schwendicke 2016[[34](#_ENREF_34)] | Microsimulation | Yes | 10 years | Adults (35-94 years) | Mexico | Health system |
| Singh 2015[[35](#_ENREF_35)] | Comparative risk assessment framework | Yes | 1 year | Childs and adults (14-79 years) | Germany | Health system |
| Vecino-Ortiz 2018[[36](#_ENREF_36)] | Comparative risk assessment framework | Yes | Lifetime | Adults (>20 years) | World | Health system |
| Veerman 2016[[37](#_ENREF_37)] | Proportional multi-state lifetable model | Yes | 25 years | Total population | Colombia | Health system (public) |
| Wang 2012[[38](#_ENREF_38)] | Dynamic population-based model | No | 10 years | Total population | Australia | Societal |
| Wilson 2015[[39](#_ENREF_39)] | Physiology, population, healthcare system, and outcomes models | No | 5, 10, 20 years | Adults | USA | Health system |
| Wright 2015[[40](#_ENREF_40)] | Markov cohort CHOICES-ACE | No | 10 years | Total population from U.S.-Mexico border. | USA | Societal |

1. **Model inputs by study**

| **Study ID** | **Incidence** | **Vital statistics** | **Longitudinal data** | **Representative survey** | **Other** |
| --- | --- | --- | --- | --- | --- |
| Afshin 2015[[1](#_ENREF_1)] | Yes | Yes | No | Yes | Nine obesity-related diseases (ischemic heart disease, hypertensive heart disease, ischemic stroke, diabetes, colorectal cancer, kidney cancer, breast cancer, endometrial cancer and osteoarthritis). |
| Barrientos-G. 2017[[2](#_ENREF_2)] | No | No | No | Yes | No |
| Basu 2013[[3](#_ENREF_3)] | No | Yes | No | Yes | RR for consumption de SSB and health conditions |
| Basu 2014a[[4](#_ENREF_4)] | Yes | Yes | Yes | Yes | Elasticity/consumption |
| Basu 2014b[[5](#_ENREF_5)] | No | No | No | No | Elasticity/consumption (NHANES)). US Department of Agriculture Quarterly Food-at-Home Price Database, Supplemental Nutrition Assistance Program (SNAP) data |
| Breeze 2017[[6](#_ENREF_6)] | No | No | No | No | Elasticity/purchases |
| Briggs 2013a[[7](#_ENREF_7)] | No | No | No | No | Elasticity/consumption (NHANES)). US Department of Agriculture to identify the distribution of added sugars (sucrose, fructose, or glucose, including corn-derived sweeteners) per gram in foods and SSB, US Census Bureau’s Annual Survey of Manufactures data set to identify manufacturers |
| Briggs 2013b[[8](#_ENREF_8)] | Yes | Yes | Yes | Yes | No |
| Briggs 2017[[9](#_ENREF_9)] | No | No | No | Yes | SSB consumption, obesity prevalence. |
| Brown 2018[[10](#_ENREF_10)] | No | No | No | Yes | SSB price, expense and quantities purchased |
| Cobiac 2017[[11](#_ENREF_11)] | Yes | No | Yes | Yes | Sales, consumption, elasticity, etc. |
| Collins 2015[[12](#_ENREF_12)] | Yes | Yes | No | Yes | Lethality and costs |
| Crino 2017[[13](#_ENREF_13)] | No | Yes | No | Yes | Published study data-based |
| Gortmaker 2015a[[14](#_ENREF_14)] | Yes | Yes | No | Yes | No |
| Gortmaker 2015b[[15](#_ENREF_15)] | Yes | Yes | No | Yes | No |
| Kristensen 2014[[16](#_ENREF_16)] | Yes | Yes | No | Yes | No |
| Lal 2017[[17](#_ENREF_17)] | No | No | Yes | No | No |
| Lee 2018[[18](#_ENREF_18)] | Yes | Yes | No | Yes | No |
| Lieffers 2018[[19](#_ENREF_19)] | No | No | Yes | Yes | Geographic data of population distribution, schools, kiosks, greengrocers, purchasing and consumption patterns |
| Lin 2011[[20](#_ENREF_20)] | Yes | Yes | No | Yes | No |
| Long 2015[[21](#_ENREF_21)] | No | No | No | Yes | No |
| Ma 2016[[22](#_ENREF_22)] | Yes | Yes | No | Yes | No |
| Magnus 2016[[23](#_ENREF_23)] | No | No | No | Yes | National Diet Survey and Soft Drinks Association annual reports intake in the UK population |
| Manyema 2014[[24](#_ENREF_24)] | Yes | Yes | No | Yes | Consumption of sodium in foods |
| Manyema 2015[[25](#_ENREF_25)] | No | Yes | No | Yes | Elasticity |
| Manyema 2016[[26](#_ENREF_26)] | No | Yes | No | Yes | Elasticity |
| Mekonnen 2013[[27](#_ENREF_27)] | No | Yes | No | Yes | Elasticity |
| Nomaguchi 2017[[28](#_ENREF_28)] | Yes | Yes | Yes | Yes | Elasticity/consumption |
| Pearson-Stuttard 2017[[29](#_ENREF_29)] | Yes | Yes | No | Yes | Health conditions |
| Penalvo 2017[[30](#_ENREF_30)] | Yes | Yes | No | Yes | Consumption of fruits, vegetables, SSB, by age and sex. |
| Rezende 2016[[31](#_ENREF_31)] | No | Yes | No | Yes | No |
| Sacks 2011[[32](#_ENREF_32)] | No | Yes | Yes | Yes | No |
| Sanchez-R. 2016[[33](#_ENREF_33)] | Yes | Yes | No | Yes | No |
| Schwendicke 2016[[34](#_ENREF_34)] | Yes | Yes | Yes | Yes | Elasticity/consumption |
| Singh 2015[[35](#_ENREF_35)] | Yes | No | No | No | No |
| Vecino-Ortiz 2018[[36](#_ENREF_36)] | No | Yes | No | Yes | DALYs del GBD, RR for consumption de SSB, diabetes, BMI and other conditions |
| Veerman 2016[[37](#_ENREF_37)] | No | Yes | No | Yes | Socio-economic level surveys and SSBs baseline consumption data |
| Wang 2012[[38](#_ENREF_38)] | Yes | No | no | Yes | Life Tables |
| Wilson 2015[[39](#_ENREF_39)] | Yes | Yes | Yes | Yes | Elasticity/consumption |
| Wright 2015[[40](#_ENREF_40)] | Yes | Yes | No | Yes | Anatomic and biologic variables for the Archimedes model |

1. **Model results 1, by study**

| **Study ID** | **Variation in consumption** | **Incidence** | **Prevalence** | **Mortality** | **Life years** | **DALYs/**  **QALYs** | **Direct**  **costs** | **Indirect costs** | **Tax collection** | **Cost-effectiveness** |
| --- | --- | --- | --- | --- | --- | --- | --- | --- | --- | --- |
| Afshin 2015[[1](#_ENREF_1)] | Yes | No | No | Aggregated | Aggregated | Yes | Yes | No | No | No |
| Barrientos-G. 2017[[2](#_ENREF_2)] | Yes | No | No | No | No | No | Yes | No | No | Yes |
| Basu 2013[[3](#_ENREF_3)] | No | No | No | Yes | No | No | No | No | No | No |
| Basu 2014a[[4](#_ENREF_4)] | Yes | No | No | No | No | No | No | No | No | No |
| Basu 2014b[[5](#_ENREF_5)] | Yes | No | No | No | No | No | Yes | No | No | No |
| Breeze 2017[[6](#_ENREF_6)] | Yes | No | No | No | No | No | No | No | No | No |
| Briggs 2013a[[7](#_ENREF_7)] | Yes | No | No | No | No | No | No | No | No | No |
| Briggs 2013b[[8](#_ENREF_8)] | Aggregated | No | No | Yes | Yes | Yes | Yes | Yes | No | No |
| Briggs 2017[[9](#_ENREF_9)] | Yes | No | Yes | No | No | No | No | No | No | No |
| Brown 2018[[10](#_ENREF_10)] | Yes | No | Yes | No | No | No | No | No | Yes | No |
| Cobiac 2017[[11](#_ENREF_11)] | No | Yes | Yes | No | No | No | No | No | No | No |
| Collins 2015[[12](#_ENREF_12)] | Yes | No | No | No | No | Yes | Aggregated | No | No | Yes |
| Crino 2017[[13](#_ENREF_13)] | Yes | No | No | No | No | Yes | Yes | No | No | No |
| Gortmaker 2015a[[14](#_ENREF_14)] | Yes | No | No | Aggregated | Aggregated | Yes | Yes | No | No | No |
| Gortmaker 2015b[[15](#_ENREF_15)] | Yes | No | No | Yes | Yes | Yes | Yes | Yes | No | Yes |
| Kristensen 2014[[16](#_ENREF_16)] | Yes | No | No | Yes | No | no | Yes | Yes | No | Yes |
| Lal 2017[[17](#_ENREF_17)] | Yes | No | No | No | No | No | No | No | No | No |
| Lee 2018[[18](#_ENREF_18)] | Yes | No | No | Aggregated | Yes | Yes | Yes | No | Yes | No |
| Lieffers 2018[[19](#_ENREF_19)] | Yes | No | No | No | No | No | No | No | No | No |
| Lin 2011[[20](#_ENREF_20)] | Aggregated | No | No | Aggregated | No | No | Yes | Yes | No | No |
| Long 2015[[21](#_ENREF_21)] | Yes | Yes | No | No | No | No | No | No | Yes | No |
| Ma 2016[[22](#_ENREF_22)] | Yes | No | No | No | Yes | Yes | Yes | No | Yes | Yes |
| Magnus 2016[[23](#_ENREF_23)] | Yes | No | Yes | No | No | No | No | No | No | No |
| Manyema 2014[[24](#_ENREF_24)] | Aggregated | No | No | Aggregated | Aggregated | Yes | Yes | No | No | No |
| Manyema 2015[[25](#_ENREF_25)] | Yes | No | Yes | No | No | No | No | No | No | No |
| Manyema 2016[[26](#_ENREF_26)] | Yes | No | Yes | Yes | Yes | Yes | Yes | No | No | No |
| Mekonnen 2013[[27](#_ENREF_27)] | Yes | Yes | No | Yes | No | Yes | Yes | No | No | No |
| Nomaguchi 2017[[28](#_ENREF_28)] | Yes | No | No | Yes | No | No | Yes | No | No | No |
| Pearson-Stuttard 2017[[29](#_ENREF_29)] | Yes | No | No | Yes | Yes | Yes | Yes | Yes | Yes | Yes |
| Penalvo 2017[[30](#_ENREF_30)] | Yes | No | No | Yes | No | No | No | No | No | No |
| Rezende 2016[[31](#_ENREF_31)] | No | No | No | Yes | No | No | No | No | No | No |
| Sacks 2011[[32](#_ENREF_32)] | Yes | No | No | Yes | No | No | No | No | No | No |
| Sanchez-R. 2016[[33](#_ENREF_33)] | Yes | No | No | No | No | Yes | Yes | No | No | Yes |
| Schwendicke 2016[[34](#_ENREF_34)] | Yes | No | No | Yes | No | No | Yes | No | No | No |
| Singh 2015[[35](#_ENREF_35)] | Yes | No | No | No | No | No | Yes | No | Yes | No |
| Vecino-Ortiz 2018[[36](#_ENREF_36)] | No | No | No | Yes | No | Yes | No | No | No | No |
| Veerman 2016[[37](#_ENREF_37)] | No | No | No | No | No | No | No | No | No | No |
| Wang 2012[[38](#_ENREF_38)] | Yes | No | No | Yes | Yes | Yes | Yes | No | Yes | No |
| Wilson 2015[[39](#_ENREF_39)] | Yes | No | No | Yes | No | No | Yes | No | No | No |
| Wright 2015[[40](#_ENREF_40)] | No | No | No | Aggregated | Aggregated | Yes | Yes | Yes | No | No |

1. **Model results 2, by study**

| **Study ID** | **SSB sales** | **Equity** | **Obesity/**  **Overweight** | **Diabetes** | **Cardiovas. disease** | **Cancer** | **Cavities** | **Bulling** | **Other** |
| --- | --- | --- | --- | --- | --- | --- | --- | --- | --- |
| Afshin 2015[[1](#_ENREF_1)] | No | Yes | Yes | Aggregated | Aggregated | Yes | No | No | No |
| Barrientos-G. 2017[[2](#_ENREF_2)] | Yes | Yes | Yes | Aggregated | No | No | No | No | BMI, METS, total balance energy, exposure time to screens |
| Basu 2013[[3](#_ENREF_3)] | No | No | Aggregated | Aggregated | Aggregated | No | No | No | No |
| Basu 2014a[[4](#_ENREF_4)] | No | No | Yes | Yes | No | No | No | No | No |
| Basu 2014b[[5](#_ENREF_5)] | Yes | Yes | Yes | Yes | No | No | No | No | Incremental costs, quality-adjusted life-years (QALYs), body mass index, Alternative Healthy Eating Index, Food Security Score, diabetes person-years, and deaths from myocardial infarctions (MIs) and strokes. |
| Breeze 2017[[6](#_ENREF_6)] | Yes | Yes | Yes | Yes | No | No | No | No | Kilocalorie per capita and glycemic load changes |
| Briggs 2013a[[7](#_ENREF_7)] | Yes | Yes | Yes | Yes | No | No | No | No | per capita kilocalorie and glycemic load changes |
| Briggs 2013b[[8](#_ENREF_8)] | No | No | Aggregated | Yes | Yes | Yes | No | No | Depression and diabetes related conditions (blindness, ulcer, renal insufficiency, amputation) |
| Briggs 2017[[9](#_ENREF_9)] | No | Yes | Yes | No | No | No | No | No | No |
| Brown 2018[[10](#_ENREF_10)] | No | Yes | Yes | No | No | No | No | No | SSB expenditures |
| Cobiac 2017[[11](#_ENREF_11)] | No | No | Yes | Yes | No | No | Yes | No | No |
| Collins 2015[[12](#_ENREF_12)] | No | No | No | No | Yes | No | No | No | No |
| Crino 2017[[13](#_ENREF_13)] | No | No | No | Yes | Yes | Yes | No | No | No |
| Gortmaker 2015a[[14](#_ENREF_14)] | No | No | Yes | Aggregated | Aggregated | Aggregated | No | No | Legislation costs, industry costs |
| Gortmaker 2015b[[15](#_ENREF_15)] | No | Yes | Yes | Yes | Yes | Yes | No | No | Arthritis |
| Kristensen 2014[[16](#_ENREF_16)] | No | No | Yes | Yes | Yes | Yes | No | No | No |
| Lal 2017[[17](#_ENREF_17)] | No | No | Yes | No | No | No | No | No | No |
| Lee 2018[[18](#_ENREF_18)] | Yes | Yes | Yes | Aggregated | Aggregated | Aggregated | No | No | Elasticity, legislation costs, implementing tax, out of pocket costs; returns on investment in healthcare cost, savings in 10 years, concentration index ®rst 10 years |
| Lieffers 2018[[19](#_ENREF_19)] | No | No | Yes | No | No | No | No | No | No |
| Lin 2011[[20](#_ENREF_20)] | No | No | Aggregated | Yes | Yes | Yes | No | No | No |
| Long 2015[[21](#_ENREF_21)] | Yes | Yes | Yes | No | No | No | No | No | No |
| Ma 2016[[22](#_ENREF_22)] | No | Yes | Yes | Yes | Yes | Yes | No | No | BMI, stroke, ischemic heart disease, hypertensive heart disease, diabetes mellitus, osteoarthritis, post-menopausal breast cancer, colon cancer, endometrial cancer, and kidney cancer, Cost per BMI unit reduction |
| Magnus 2016[[23](#_ENREF_23)] | No | No | Yes | Aggregated | Yes | No | No | No | No |
| Manyema 2014[[24](#_ENREF_24)] | No | No | Aggregated | Aggregated | Aggregated | Aggregated | No | No | Societal costs |
| Manyema 2015[[25](#_ENREF_25)] | No | No | Yes | No | No | No | No | No | No |
| Manyema 2016[[26](#_ENREF_26)] | No | No | Yes | Yes | No | No | No | No | No |
| Mekonnen 2013[[27](#_ENREF_27)] | No | No | Yes | No | Yes | No | No | No | No |
| Nomaguchi 2017[[28](#_ENREF_28)] | No | No | Yes | Yes | Yes | No | No | No | Blood pressure |
| Pearson-Stuttard 2017[[29](#_ENREF_29)] | No | No | Yes | Yes | Yes | Yes | No | No | Osteoarthritis |
| Penalvo 2017[[30](#_ENREF_30)] | No | Yes | No | No | Yes | No | No | No | No |
| Rezende 2016[[31](#_ENREF_31)] | No | Yes | No | Yes | Yes | No | No | No | No |
| Sacks 2011[[32](#_ENREF_32)] | No | No | No | Yes | No | No | No | No | No |
| Sanchez-R. 2016[[33](#_ENREF_33)] | No | No | Yes | Yes | Yes | No | No | No | No |
| Schwendicke 2016[[34](#_ENREF_34)] | No | No | Yes | Aggregated | Yes | No | No | No | No |
| Singh 2015[[35](#_ENREF_35)] | No | No | No | No | No | No | Yes | No | No |
| Vecino-Ortiz 2018[[36](#_ENREF_36)] | No | No | Aggregated | Aggregated | Aggregated | Aggregated | No | No | No |
| Veerman 2016[[37](#_ENREF_37)] | No | No | No | No | No | No | No | No | No |
| Wang 2012[[38](#_ENREF_38)] | Yes | No | Yes | Yes | Yes | Yes | No | No | BMI, stroke, ischemic heart disease, hypertensive heart disease, diabetes mellitus, osteoarthritis, post-menopausal breast cancer, colon cancer, endometrial cancer, and kidney cancer, Disease-related quality of life at every age |
| Wilson 2015[[39](#_ENREF_39)] | No | No | Yes | Yes | Yes | No | No | No | No |
| Wright 2015[[40](#_ENREF_40)] | No | No | Yes | Aggregated | Aggregated | No | No | No | No |

1. **Taxonomy of model structures by study**

| **Study ID** | **Interaction allowed** | **Aggregate/ Individual/ econometric/ epidemiological** | **Untimed, Timed Continuous** | **Cohort,**  **Multi-cohort** |
| --- | --- | --- | --- | --- |
| Afshin 2015[[1](#_ENREF_1)] | No | Epidemiological | Untimed | NR |
| Barrientos-G. 2017[[2](#_ENREF_2)] | No | Aggregated | Timed | Cohort |
| Basu 2013[[3](#_ENREF_3)] | No | Individual | Continuous | Multi-cohort |
| Basu 2014a[[4](#_ENREF_4)] | No | Individual | Continuous | Multi-cohort |
| Basu 2014b[[5](#_ENREF_5)] | No | Individual | Continuous | Multi-cohort |
| Breeze 2017[[6](#_ENREF_6)] | No | Individual | Timed | Cohort |
| Briggs 2013a[[7](#_ENREF_7)] | No | Epidemiological | Untimed | NR |
| Briggs 2013b[[8](#_ENREF_8)] | No | Epidemiological | Untimed | NR |
| Briggs 2017[[9](#_ENREF_9)] | No | Epidemiological | Untimed | NR |
| Brown 2018[[10](#_ENREF_10)] | No | Aggregated | Timed | Multi-cohort |
| Cobiac 2017[[11](#_ENREF_11)] | No | Aggregated | Continuous | Cohort |
| Collins 2015[[12](#_ENREF_12)] | No | Aggregated | Untimed | Cohort |
| Crino 2017[[13](#_ENREF_13)] | No | Aggregated | Timed | Multi-cohort |
| Gortmaker 2015a[[14](#_ENREF_14)] | No | Individual | Timed | Cohort |
| Gortmaker 2015b[[15](#_ENREF_15)] | No | Individual | Timed | Cohort |
| Kristensen 2014[[16](#_ENREF_16)] | No | Individual | Timed | Cohort |
| Lal 2017[[17](#_ENREF_17)] | No | Aggregated | Timed | Multi-cohort |
| Lee 2018[[18](#_ENREF_18)] | No | Individual | Timed | Cohort |
| Lieffers 2018[[19](#_ENREF_19)] | No | Epidemiological | Untimed | Not applicable |
| Lin 2011[[20](#_ENREF_20)] | No | Econometric | Not applicable | Not applicable |
| Long 2015[[21](#_ENREF_21)] | No | Individual | Timed | Cohort |
| Ma 2016[[22](#_ENREF_22)] | No | Individual | Continuous | Multi-cohort |
| Magnus 2016[[23](#_ENREF_23)] | No | Aggregated | Timed | Cohort |
| Manyema 2014[[24](#_ENREF_24)] | No | Epidemiological | Untimed | Cohort |
| Manyema 2015[[25](#_ENREF_25)] | No | Aggregated | Untimed | Cohort |
| Manyema 2016[[26](#_ENREF_26)] | No | Aggregated | Untimed | Cohort |
| Mekonnen 2013[[27](#_ENREF_27)] | No | Aggregated | Timed | Cohort |
| Nomaguchi 2017[[28](#_ENREF_28)] | No | Individual | Timed | Cohort |
| Pearson-Stuttard 2017[[29](#_ENREF_29)] | No | Aggregated | Untimed | Cohort |
| Penalvo 2017[[30](#_ENREF_30)] | No | Aggregated | Untimed | Cohort |
| Rezende 2016[[31](#_ENREF_31)] | No | Epidemiological | Untimed | Cohort |
| Sacks 2011[[32](#_ENREF_32)] | No | Individual | Timed | Cohort |
| Sanchez-R. 2016[[33](#_ENREF_33)] | No | Individual | Timed | Cohort |
| Schwendicke 2016[[34](#_ENREF_34)] | No | Individual | Timed | Cohort |
| Singh 2015[[35](#_ENREF_35)] | No | Epidemiological | Untimed | Cohort |
| Vecino-Ortiz 2018[[36](#_ENREF_36)] | No | Aggregated | Timed | NR |
| Veerman 2016[[37](#_ENREF_37)] | No | Aggregated | Timed | Multi-cohort |
| Wang 2012[[38](#_ENREF_38)] | No | Individual | Timed | Cohort |
| Wilson 2015[[39](#_ENREF_39)] | No | Individual | Continuous | Cohort |
| Wright 2015[[40](#_ENREF_40)] | No | Individual | Timed | Cohort |

1. **Model subgroups, interventions assessed and applicability by study**

| **Study ID** | **Subgroups** | | | | **interventions assessed** | | | | | **Applicability** | | |
| --- | --- | --- | --- | --- | --- | --- | --- | --- | --- | --- | --- | --- |
| **Children/teenage** | **Gender** | **Income level** | **Vulnerable group** | **Taxes** | **School environment** | **Adver-tising** | **Label-ling** | **Other** | **Effort / requirement** | **Applicability / reproducibility** |
| Afshin 2015[[1](#_ENREF_1)] | Yes | No | Yes | Socioeconomic level area | No | No | Yes | No | No | Moderate | Moderate |
| Barrientos-G. 2017[[2](#_ENREF_2)] | Yes | No | No | No | No | Yes | No | No | No | Low | High |
| Basu 2013[[3](#_ENREF_3)] | No | Yes | No | No | No | No | No | No | No | Moderate | Moderate |
| Basu 2014a[[4](#_ENREF_4)] | No | Yes | Yes | No | Yes | No | No | No | No | Moderate | Moderate |
| Basu 2014b[[5](#_ENREF_5)] | Yes | Yes | Yes | Ethnicity | Yes | No | No | No | No | Moderate | Moderate |
| Breeze 2017[[6](#_ENREF_6)] | Yes | Yes | Yes | Rural/Urban status | Yes | No | No | No | No | Moderate | High |
| Briggs 2013a[[7](#_ENREF_7)] | Yes | Yes | No | Ethnicity | Yes | No | No | No | No | Moderate | Moderate |
| Briggs 2013b[[8](#_ENREF_8)] | No | No | No | No | Yes | No | No | No | No | High | Moderate |
| Briggs 2017[[9](#_ENREF_9)] | No | Yes | Yes | No | Yes | No | No | No | No | Moderate | Moderate |
| Brown 2018[[10](#_ENREF_10)] | No | No | Yes | No | Yes | No | No | No | No | Moderate | Moderate |
| Cobiac 2017[[11](#_ENREF_11)] | Yes | Yes | No | No | Yes | No | No | No | No | Moderate | Moderate |
| Collins 2015[[12](#_ENREF_12)] | No | No | No | No | Yes | Yes | No | No | No | Low | Moderate |
| Crino 2017[[13](#_ENREF_13)] | Yes | Yes | No | No | No | No | No | No | 20% sugary drinks duty on local authorities | Moderate | Moderate |
| Gortmaker 2015a[[14](#_ENREF_14)] | Yes | Yes | No | No | No | No | No | No | Ration restriction and product reformulation | Moderate | Moderate |
| Gortmaker 2015b[[15](#_ENREF_15)] | Yes | No | No | No | Yes | Yes | Yes | No | No | Moderate | Moderate |
| Kristensen 2014[[16](#_ENREF_16)] | Yes | No | No | No | Yes | Yes | Yes | No | No | Moderate | Moderate |
| Lal 2017[[17](#_ENREF_17)] | Yes | No | No | Ethnicity | Yes | No | No | No | No | Moderate | Moderate |
| Lee 2018[[18](#_ENREF_18)] | No | No | Yes | Socioeconomic deprivation quintiles area | Yes | No | No | No | No | Moderate | Moderate |
| Lieffers 2018[[19](#_ENREF_19)] | Yes | Yes | No | Literacy, City of residence | No | No | No | Yes | No | High | Moderate |
| Lin 2011[[20](#_ENREF_20)] | Yes | Yes | No | No | No | No | No | No | Healthy diet promotion | Moderate | Moderate |
| Long 2015[[21](#_ENREF_21)] | No | No | Yes | No | Yes | No | No | No | No | Moderate | Moderate |
| Ma 2016[[22](#_ENREF_22)] | Yes | Yes | No | No | Yes | No | No | No | No | Moderate | High |
| Magnus 2016[[23](#_ENREF_23)] | No | No | Yes | No | Yes | No | No | No | No | Moderate | Moderate |
| Manyema 2014[[24](#_ENREF_24)] | Yes | Yes | No | No | Yes | No | No | No | No | Moderate | Moderate |
| Manyema 2015[[25](#_ENREF_25)] | No | Yes | No | No | Yes | No | No | No | No | Moderate | Moderate |
| Manyema 2016[[26](#_ENREF_26)] | No | Yes | No | No | Yes | No | No | No | No | Moderate | Moderate |
| Mekonnen 2013[[27](#_ENREF_27)] | No | Yes | No | No | Yes | No | No | No | No | Moderate | Moderate |
| Nomaguchi 2017[[28](#_ENREF_28)] | No | No | Yes | Africans/ Mexicans | Yes | No | No | No | No | Moderate | Moderate |
| Pearson-Stuttard 2017[[29](#_ENREF_29)] | No | Yes | No | No | Yes | No | No | No | No | Moderate | High |
| Penalvo 2017[[30](#_ENREF_30)] | No | Yes | No | Participants of a nutritional assistance program | Yes | No | Yes | No | Subsidies | Moderate | Moderate |
| Rezende 2016[[31](#_ENREF_31)] | No | No | Yes | Education level | Yes | No | No | No | Subsidies | Moderate | Moderate |
| Sacks 2011[[32](#_ENREF_32)] | No | No | No | No | No | No | No | No | No | Low | Moderate |
| Sanchez-R. 2016[[33](#_ENREF_33)] | No | Yes | No | No | Yes | No | No | Yes | No | Moderate | Moderate |
| Schwendicke 2016[[34](#_ENREF_34)] | No | No | No | No | Yes | No | No | No | No | Moderate | Moderate |
| Singh 2015[[35](#_ENREF_35)] | Yes | Yes | No | No | Yes | No | No | No | No | Moderate | Moderate |
| Vecino-Ortiz 2018[[36](#_ENREF_36)] | No | Yes | No | No | No | No | No | No | No | Moderate | Moderate |
| Veerman 2016[[37](#_ENREF_37)] | No | No | Yes | No | Yes | Yes | No | No | No | Low | Moderate |
| Wang 2012[[38](#_ENREF_38)] | No | Yes | No | No | Yes | No | No | No | No | Moderate | High |
| Wilson 2015[[39](#_ENREF_39)] | No | No | No | No | Yes | No | No | No | No | Moderate | Moderate |
| Wright 2015[[40](#_ENREF_40)] | No | No | No | No | No | No | No | No | Community-Based Weight Control Intervention | Moderate | Moderate |

**References**

1. Afshin A, Micha R, Khatibzadeh S, Fahimi S, Shi P, Powles J, Singh G, Yakoob MY, Abdollahi M, Al-Hooti S *et al*: **The impact of dietary habits and metabolic risk factors on cardiovascular and diabetes mortality in countries of the Middle East and North Africa in 2010: A comparative risk assessment analysis**. *BMJ Open* 2015, **5**(5).

2. Barrientos-Gutierrez T, Zepeda-Tello R, Rodrigues ER, Colchero-Aragones A, Rojas-Martõnez R, Lazcano-Ponce E, Hernandez-Avila M, Rivera-Dommarco J, Meza R: **Expected population weight and diabetes impact of the 1-peso-per-litre tax to sugar sweetened beverages in Mexico**. *PLoS ONE* 2017, **12**(5).

3. Basu S, Seligman H, Bhattacharya J: **Nutritional policy changes in the supplemental nutrition assistance program: a microsimulation and cost-effectiveness analysis**. *Medical Decision Making* 2013, **33**(7):937-948.

4. Basu S, Vellakkal S, Agrawal S, Stuckler D, Popkin B, Ebrahim S: **Averting obesity and type 2 diabetes in India through sugar-sweetened beverage taxation: an economic-epidemiologic modeling study**. *PLoS Medicine* 2014, **11**(1):e1001582-e1001582.

5. Basu S, Lewis K: **Reducing Added Sugars in the Food Supply Through a Cap-and-Trade Approach**. *American Journal of Public Health* 2014, **104**(12):2432-2438.

6. Breeze PR, Thomas C, Squires H, Brennan A, Greaves C, Diggle P, Brunner E, Tabak A, Preston L, Chilcott J: **Cost-effectiveness of population-based, community, workplace and individual policies for diabetes prevention in the UK**. *Diabetic Medicine* 2017, **34**(8):1136-1144.

7. Briggs AD, Mytton OT, Kehlbacher A, Tiffin R, Rayner M, Scarborough P: **Overall and income specific effect on prevalence of overweight and obesity of 20% sugar sweetened drink tax in UK: econometric and comparative risk assessment modelling study**. *BMJ* 2013, **347**:f6189.

8. Briggs AD, Mytton OT, Madden D, O'Shea D, Rayner M, Scarborough P: **The potential impact on obesity of a 10% tax on sugar-sweetened beverages in Ireland, an effect assessment modelling study**. *BMC public health* 2013, **13**:860.

9. Briggs ADM, Mytton OT, Kehlbacher A, Tiffin R, Elhussein A, Rayner M, Jebb SA, Blakely T, Scarborough P: **Health impact assessment of the UK soft drinks industry levy: a comparative risk assessment modelling study**. *The Lancet Public Health* 2017, **2**(1):e15-e22.

10. Brown V, Ananthapavan J, Veerman L, Sacks G, Lal A, Peeters A, Backholer K, Moodie M: **The Potential Cost-Effectiveness and Equity Impacts of Restricting Television Advertising of Unhealthy Food and Beverages to Australian Children**. *Nutrients* 2018, **10**(5):N.PAG-N.PAG.

11. Cobiac LJ, Tam K, Veerman L, Blakely T: **Taxes and Subsidies for Improving Diet and Population Health in Australia: A Cost-Effectiveness Modelling Study**. *PLoS Medicine* 2017, **14**(2).

12. Collins B, Capewell S, O'Flaherty M, Timpson H, Razzaq A, Cheater S, Ireland R, Bromley H: **Modelling the Health Impact of an English Sugary Drinks Duty at National and Local Levels**. *PLoS ONE [Electronic Resource]* 2015, **10**(6):e0130770.

13. Crino M, Mantilla Herrera AM, Ananthapavan J, Wu JHY, Neal B, Yong Yi L, Miaobing Z, Lal A, Sacks G: **Modelled Cost-Effectiveness of a Package Size Cap and a Kilojoule Reduction Intervention to Reduce Energy Intake from Sugar-Sweetened Beverages in Australia**. *Nutrients* 2017, **9**(9):1-17.

14. Gortmaker SL, Long MW, Resch SC, Ward ZJ, Cradock AL, Barrett JL, Wright DR, Sonneville KR, Giles CM, Carter RC *et al*: **Cost Effectiveness of Childhood Obesity Interventions: Evidence and Methods for CHOICES**. *American Journal of Preventive Medicine* 2015, **49**(1):102-111.

15. Gortmaker SL, Wang YC, Long MW, Giles CM, Ward ZJ, Barrett JL, Kenney EL, Sonneville KR, Sadaf Afzal A, Resch SC *et al*: **Three Interventions That Reduce Childhood Obesity Are Projected To Save More Than They Cost To Implement**. *Health Affairs* 2015, **34**(11):1932-1939.

16. Kristensen AH, Flottemesch TJ, Maciosek MV, Jenson J, Barclay G, Ashe M, Sanchez EJ, Story M, Teutsch SM, Brownson RC: **Reducing childhood obesity through U.S. federal policy: a microsimulation analysis**. *American Journal of Preventive Medicine* 2014, **47**(5):604-612.

17. Lal A, Mantilla-Herrera AM, Veerman L, Backholer K, Sacks G, Moodie M, Siahpush M, Carter R, Peeters A: **Modelled health benefits of a sugar-sweetened beverage tax across different socioeconomic groups in Australia: A cost-effectiveness and equity analysis**. *PLoS Medicine* 2017, **14**(6):1-17.

18. Lee BY, Ferguson MC, Hertenstein DL, Adam A, Zenkov E, Wang PI, Wong MS, Gittelsohn J, Mui Y, Brown ST: **Simulating the Impact of Sugar-Sweetened Beverage Warning Labels in Three Cities**. *American Journal of Preventive Medicine* 2018, **54**(2):197-204.

19. Lieffers JRL, Ekwaru JP, Ohinmaa A, Veugelers PJ: **The economic burden of not meeting food recommendations in Canada: The cost of doing nothing**. *PLoS ONE* 2018, **13**(4).

20. Lin BH, Smith TA, Lee JY, Hall KD: **Measuring weight outcomes for obesity intervention strategies: The case of a sugar-sweetened beverage tax**. *Economics and Human Biology* 2011, **9**(4):329-341.

21. Long MW, Gortmaker SL, Ward ZJ, Resch SC, Moodie ML, Sacks G, Swinburn BA, Carter RC, Claire Wang Y: **Cost Effectiveness of a Sugar-Sweetened Beverage Excise Tax in the U.S**. *American Journal of Preventive Medicine* 2015, **49**(1):112-123.

22. Ma Y, He FJ, Yin Y, Hashem KM, MacGregor GA: **Gradual reduction of sugar in soft drinks without substitution as a strategy to reduce overweight, obesity, and type 2 diabetes: A modelling study**. *The Lancet Diabetes and Endocrinology* 2016, **4**(2):105-114.

23. Magnus A, Moodie ML, Ferguson M, Cobiac LJ, Liberato SC, Brimblecombe J: **The economic feasibility of price discounts to improve diet in Australian Aboriginal remote communities**. *Australian & New Zealand Journal of Public Health* 2016, **40**:S36-S41.

24. Manyema M, Veerman LJ, Chola L, Tugendhaft A, Sartorius B, Labadarios D, Hofman KJ: **The potential impact of a 20% tax on sugar-sweetened beverages on obesity in South African adults: A mathematical model**. *PLoS ONE* 2014, **9**(8).

25. Manyema M, Veerman JL, Chola L, Tugendhaft A, Labadarios D, Hofman K: **Decreasing the burden of type 2 diabetes in South Africa: The impact of taxing sugar-sweetened beverages**. *PLoS ONE* 2015, **10**(11).

26. Manyema M, Veerman LJ, Tugendhaft A, Labadarios D, Hofman KJ: **Modelling the potential impact of a sugar-sweetened beverage tax on stroke mortality, costs and health-adjusted life years in South Africa**. *BMC Public Health* 2016, **16**(1):1-10.

27. Mekonnen TA, Odden MC, Coxson PG, Guzman D, Lightwood J, Wang YC, Bibbins-Domingo K: **Health benefits of reducing sugar-sweetened beverage intake in high risk populations of California: Results from the Cardiovascular Disease (CVD) policy model**. *PLoS ONE* 2013, **8**(12).

28. Nomaguchi T, Cunich M, Zapata-Diomedi B, Veerman JL: **The impact on productivity of a hypothetical tax on sugar-sweetened beverages**. *Health Policy* 2017, **121**(6):715-725.

29. Pearson-Stuttard J, Bandosz P, Rehm CD, Penalvo J, Whitsel L, Gaziano T, Conrad Z, Wilde P, Micha R, Lloyd-Williams F *et al*: **Reducing us cardiovascular disease disparities through dietary policy**. *Circulation* 2017, **135**.

30. Penalvo JL, Cudhea F, Micha R, Rehm CD, Afshin A, Whitsel L, Wilde P, Gaziano T, Pearson-Stuttard J, O'Flaherty M *et al*: **The potential impact of food taxes and subsidies on cardiovascular disease and diabetes burden and disparities in the United States**. *BMC Medicine* 2017, **15**(1):208.

31. Rezende LF, Azeredo CM, Canella DS, Luiz Odo C, Levy RB, Eluf-Neto J: **Coronary heart disease mortality, cardiovascular disease mortality and all-cause mortality attributable to dietary intake over 20years in Brazil**. *International Journal of Cardiology* 2016, **217**:64-68.

32. Sacks G, Veerman JL, Moodie M, Swinburn B: **Traffic-light nutrition labelling and junk-food tax: A modelled comparison of cost-effectiveness for obesity prevention**. *International Journal of Obesity* 2011, **35**(7):1001-1009.

33. Sanchez-Romero LM, Penko J, Coxson PG, Fernandez A, Mason A, Moran AE, Avila-Burgos L, Odden M, Barquera S, Bibbins-Domingo K: **Projected Impact of Mexico's Sugar-Sweetened Beverage Tax Policy on Diabetes and Cardiovascular Disease: A Modeling Study**. *PLoS Medicine / Public Library of Science* 2016, **13**(11):e1002158.

34. Schwendicke F, Thomson WM, Broadbent JM, Stolpe M: **Effects of Taxing Sugar-Sweetened Beverages on Caries and Treatment Costs**. *Journal of Dental Research* 2016, **95**(12):1327-1332.

35. Singh GM, Micha R, Khatibzadeh S, Lim S, Ezzati M, Mozaffarian D: **Estimated Global, Regional, and National Disease Burdens Related to Sugar-Sweetened Beverage Consumption in 2010**. *Circulation* 2015, **132**(8):639-666.

36. Vecino-Ortiz AI, Arroyo-Ariza D: **A tax on sugar sweetened beverages in Colombia: Estimating the impact on overweight and obesity prevalence across socio economic levels**. *Social Science & Medicine* 2018, **209**:111-116.

37. Veerman JL, Sacks G, Antonopoulos N, Martin J: **The impact of a tax on sugar-sweetened beverages on health and health care costs: A modelling study**. *PLoS ONE* 2016, **11**(4).

38. Wang YC, Coxson P, Shen Y-M, Goldman L, Bibbins-Domingo K: **A Penny-Per-Ounce Tax On Sugar-Sweetened Beverages Would Cut Health And Cost Burdens Of Diabetes**. *Health Affairs* 2012, **31**(1):199-207.

39. Wilson KJ, Brown HS, Bastida E: **Cost-effectiveness of a community-based weight control intervention targeting a low-socioeconomic-status Mexican-origin population**. *Health promotion practice* 2015, **16**(1):101-108.

40. Wright DR, Kenney EL, Giles CM, Long MW, Ward ZJ, Resch SC, Moodie ML, Carter RC, Wang YC, Sacks G *et al*: **Modeling the Cost Effectiveness of Child Care Policy Changes in the U.S**. *American Journal of Preventive Medicine* 2015, **49**(1):135-147.
